# Supplementary material for: Eckmaxol Isolated from Ecklonia maxima Attenuates Particulate-Matter-Induced Inflammation in MH-S Lung Macrophage
Source: MDPI journal article supplement (doi:10.3390/md20120766), 2022-12-07
Supplement: s1 [file s1]

**a**

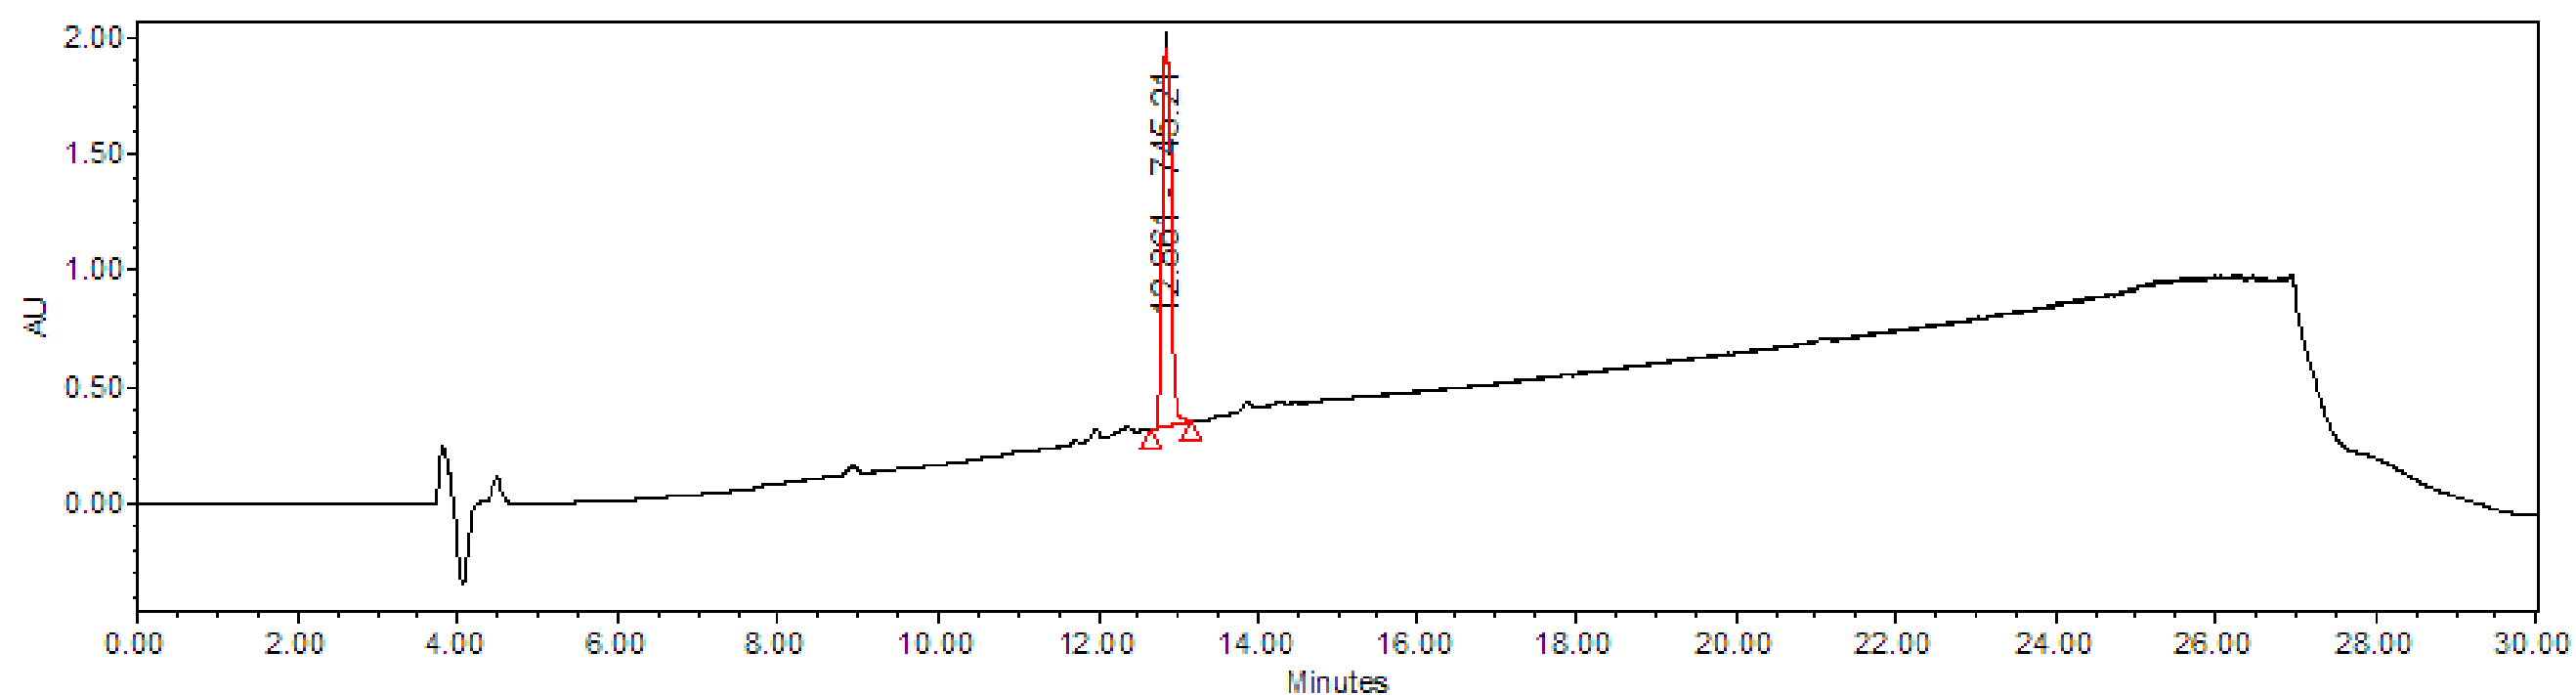

**b**

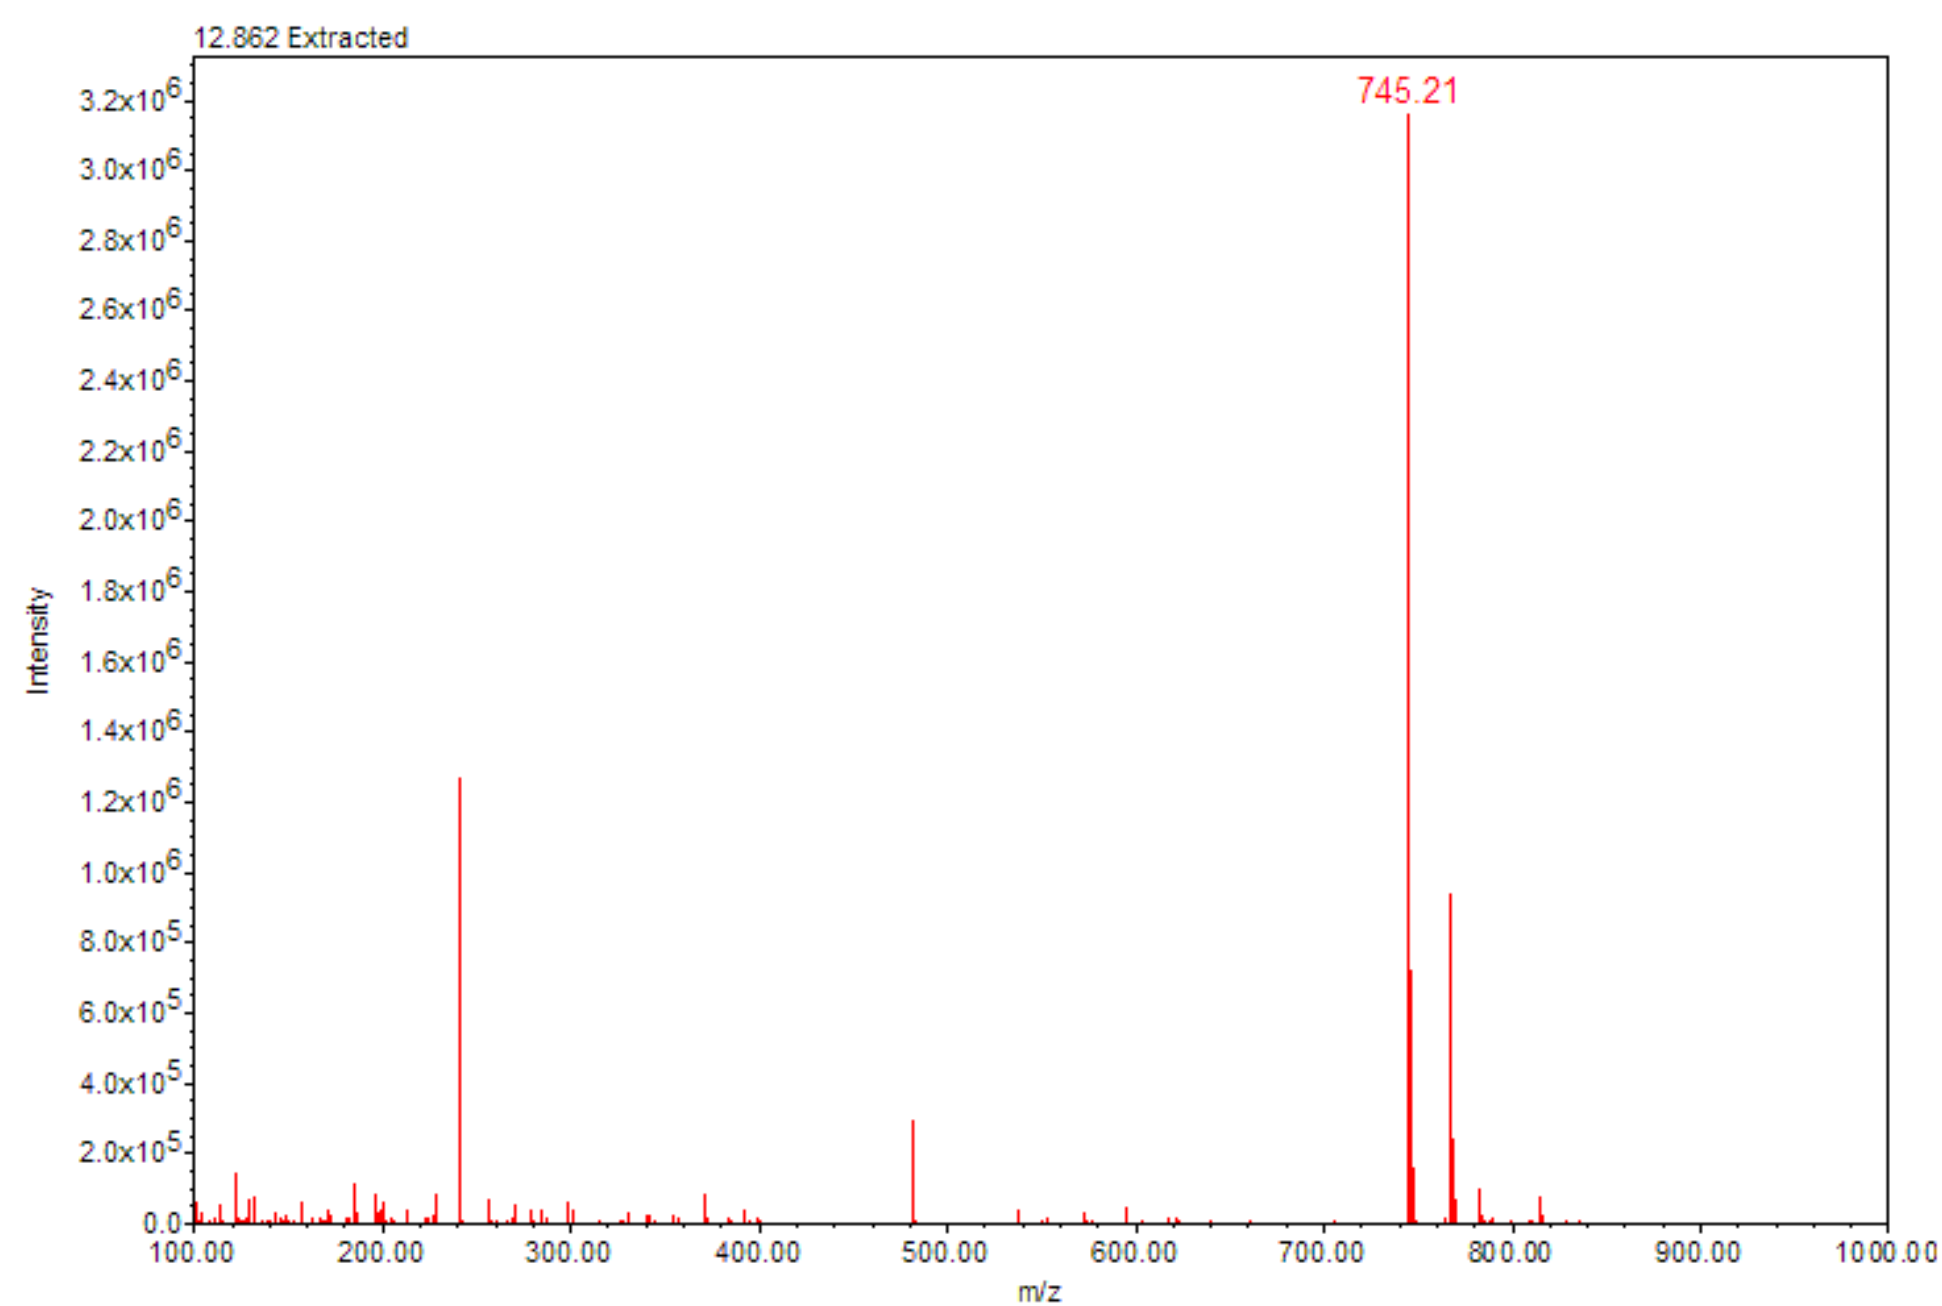

**Supplementary Figure S1. Chromatogram of Liquid Chromatography–Mass Spectrometry (LC/MS) analysis , (a) HPLC chromatogram and (b) MS spectrum (ESI+)**
